# Supplementary material for: The Cultivation Modality and Barrier Maturity Modulate the Toxicity of Industrial Zinc Oxide and Titanium Dioxide Nanoparticles on Nasal, Buccal, Bronchial, and Alveolar Mucosa Cell-Derived Barrier Models
Source: MDPI journal article supplement (doi:10.3390/ijms24065634), 2023-03-15
Supplement: s1 [file s1]

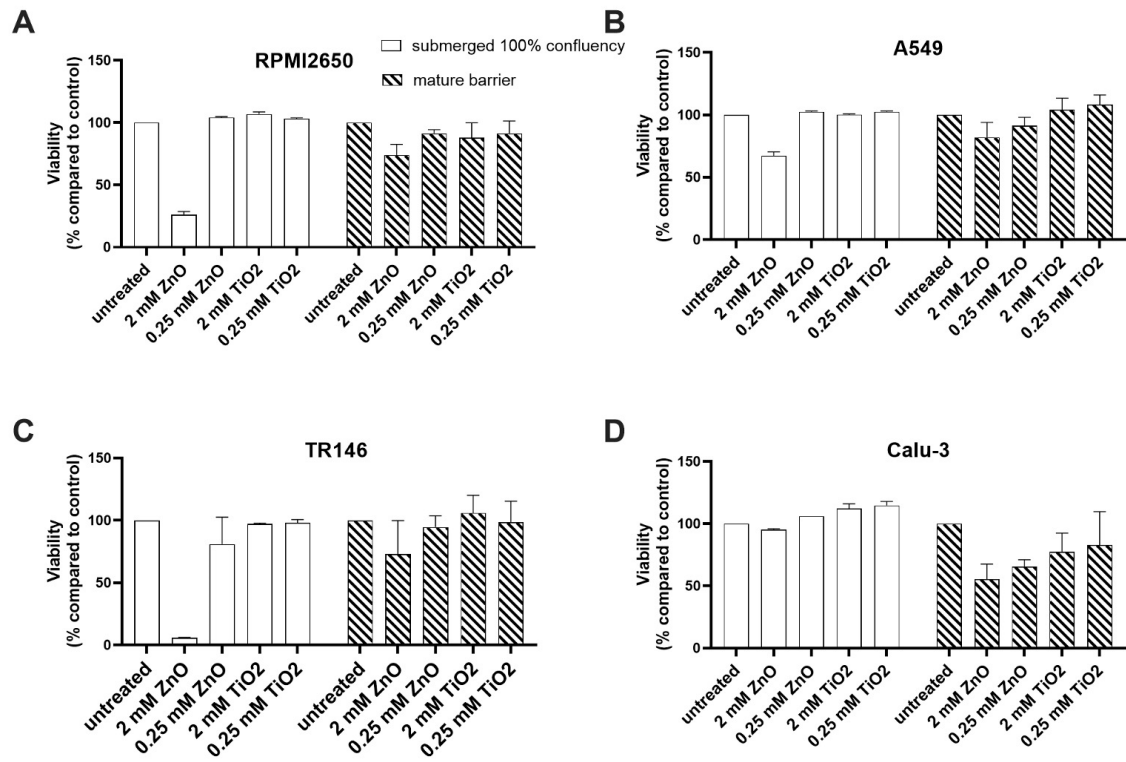

Figure S1: Comparison of conventional 2D monolayer cultures (100% confluent submerged) with mature barrier models grown 22 days under ALI cultivation protocols. (A) RPMI2650; (B) A549; (C) TR146; (D) Calu-3.
